# Supplementary material
Source: PubMed Central journal article supplement (PMC4455773)
Supplement: supp_g3.114.011916_FigureS2.pdf [file supp_g3.114.011916_FigureS2.pdf]

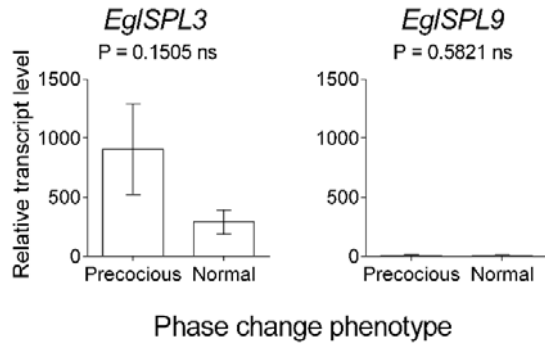

**Figure S2 Expression of *Eg/SPL3* and *Eg/SPL9* in node 10 juvenile leaves of precocious and normal phase change ecotypes of *Eucalyptus globulus*.** Expression was normalised as the percentage of expression above *Eg/EIF4* expression. Shown are the mean and standard error of the expression in 10 plants of precocious phase change phenotype (representing four families from the Wilson’s Promontory population), and nine plants of normal phase change phenotype (representing four families from Tidal River and Taranna provenances). Expression of *Eg/SPL9* was so low that it is not visible here.
