# Supplementary material
Source: PubMed Central journal article supplement (PMC4455773)
Supplement: supp_g3.114.011916_TableS2.pdf [file supp_g3.114.011916_TableS2.pdf]

**Table S2 Putative eucalypt homologs of key genes involved in vegetative and reproductive phase-change transitions in Arabidopsis, and their position in the *Eucalyptus grandis* genome and Lighthouse *E. globulus* F<sub>2</sub> linkage map.**

| Gene <sup>a</sup>         | TAIR<br>accession | <i>E. grandis</i><br>v1.1 locus <sup>b</sup> | Position (v1.1)                    | LG | cM     |
|---------------------------|-------------------|----------------------------------------------|------------------------------------|----|--------|
| <b>miR156 precursors</b>  |                   |                                              |                                    |    |        |
| <i>EgrMIR156.1</i>        |                   | na                                           | scaffold_3:6,875,645..6,875,558    | 3  | 1.41   |
| <i>EgrMIR156.2</i>        |                   | na                                           | scaffold_3:11,870,361..11,870,270  | 3  | 7.61   |
| <i>EgrMIR156.3</i>        |                   | na                                           | scaffold_3:11,879,442..11,879,528  | 3  | 7.63   |
| <i>EgrMIR156.4</i>        |                   | na                                           | scaffold_3:33,774,484..33,774,404  | 3  | 50.11  |
| <i>EgrMIR156.5</i>        |                   | na                                           | scaffold_3:50,822,714..50,822,639  | 3  | 64.76  |
| <i>EgrMIR156.6</i>        |                   | na                                           | scaffold_3:57,552,911..57,552,994  | 3  | 75.18  |
| <i>EgrMIR156.7</i>        |                   | na                                           | scaffold_3:57,574,796..57,574,878  | 3  | 75.18  |
| <i>EgrMIR156.8</i>        |                   | na                                           | scaffold_3:57,594,656..57,594,739  | 3  | 75.18  |
| <i>EgrMIR156.9</i>        |                   | na                                           | scaffold_3:57,604,491..57,604,574  | 3  | 75.18  |
| <i>EgrMIR156.10</i>       |                   | na                                           | scaffold_3:64,630,889..64,630,798  | 3  | 85.26  |
| <i>EgrMIR156.11</i>       |                   | na                                           | scaffold_3778:2795_2874            |    |        |
| <b>miR157 precursors</b>  |                   |                                              |                                    |    |        |
| <i>EgrMIR157.1</i>        |                   | na                                           | scaffold_2:10,262,540..10,262,626  | 2  | 33.15  |
| <i>EgrMIR157.2</i>        |                   | na                                           | scaffold_6:37,685,287..37,685,385  | 6  | 84.48  |
| <i>EgrMIR157.3</i>        |                   | na                                           | scaffold_10:28,534,316..28,534,229 | 10 | 70.07  |
| <i>EgrMIR157.4</i>        |                   | na                                           | scaffold_11:29,604,562..29,604,654 | 11 | 64.76  |
| <b>miR172 precursors</b>  |                   |                                              |                                    |    |        |
| <i>EgrMIR172.1</i>        |                   | na                                           | scaffold_2:47,463,700..47,463,718  | 2  | 76.81  |
| <i>EgrMIR172.2</i>        |                   | na                                           | scaffold_7:46,895,298..46,895,316  | 7  | 73.69  |
| <i>EgrMIR172.3</i>        |                   | na                                           | scaffold_7:48,069,802..48,069,820  | 7  | 77.54  |
| <i>EgrMIR172.4</i>        |                   | na                                           | scaffold_10:9,766,042..9,766,060   | 10 | 28.06  |
| <i>EgrMIR172.5</i>        |                   | na                                           | scaffold_10:11,654,521..11,654,539 | 10 | 33.87  |
| <i>EgrMIR172.6</i>        |                   | na                                           | scaffold_10:14,042,402..14,042,420 | 10 | 39.63  |
| <b>miR156/157 targets</b> |                   |                                              |                                    |    |        |
| <i>SPL2</i>               | AT5G43270         | Eucgr.B03500                                 | scaffold_2:59,707,186..59,711,577  | 2  | 109.34 |
| <i>SPL3</i>               | AT2G33810         | na                                           |                                    |    |        |
| <i>SPL4</i>               | AT1G53160         | Eucgr.F03303                                 | scaffold_6:42,095,464..42,096,829  | 6  | 101.61 |
| <i>SPL5</i>               | AT3G15270         | Eucgr.E03260                                 | scaffold_5:55,297,144..55,300,470  | 5  | 77.32  |
| <i>SPL5</i>               | AT3G15270         | Eucgr.K01046                                 | scaffold_11:13,198,982..13,200,949 | 11 | 21.65  |
| <i>SPL9</i>               | AT2G42200         | Eucgr.A02441                                 | scaffold_1:35,069,324..35,074,597  | 1  | 85.53  |
| <i>SPL9</i>               | AT2G42200         | Eucgr.K01828                                 | scaffold_11:22,648,024..22,650,837 | 11 | 48.8   |
| <i>SPL10</i>              | AT1G27370         | na                                           |                                    |    |        |
| <i>SPL11</i>              | AT1G27360         | na                                           |                                    |    |        |
| <i>SPL15</i>              | AT3G57920         | na                                           |                                    |    |        |
| <b>miR172 targets</b>     |                   |                                              |                                    |    |        |
| <i>TOE1</i>               | AT2G28550         | Eucgr.A01182                                 | scaffold_1:18,327,635..18,329,322  | 1  | 26.97  |

|                        |           |              |                                    |    |        |
|------------------------|-----------|--------------|------------------------------------|----|--------|
| <i>TOE1</i>            | AT2G28550 | Eucgr.B02453 | scaffold_2:46,666,684..46,670,642  | 2  | 71.43  |
| <i>TOE1</i>            | AT2G28550 | Eucgr.G02793 | scaffold_7:46,189,542..46,193,511  | 7  | 71.39  |
| <i>TOE1</i>            | AT2G28550 | Eucgr.J02113 | scaffold_10:27,123,430..27,127,595 | 10 | 65.12  |
| <i>SMZ</i>             | AT3G54990 | na           |                                    |    |        |
| <i>SNZ</i>             | AT2G39250 | na           |                                    |    |        |
| <i>AP2</i>             | AT4G36920 | Eucgr.I00892 | scaffold_9:18,318,869..18,322,920  | 9  | 24.3   |
| <b>Flowering genes</b> |           |              |                                    |    |        |
| <i>AP1</i>             | AT1G69120 | na           |                                    |    |        |
| <i>FD</i>              | AT4G35900 | Eucgr.F01674 | scaffold_6:21,180,795..21,182,560  | 6  | 44.75  |
| <i>FD</i>              | AT4G35900 | Eucgr.J02482 | scaffold_10:30,908,543..30,909,313 | 10 | 78.83  |
| <i>EgFLC.1</i>         | AT5G10140 | Eucgr.H04618 | scaffold_8:66,300,089..66,316,194  | 8  | 116.26 |
| <i>EgFT</i>            | AT1G65480 | Eucgr.B01458 | scaffold_2:23,917,879..23,919,338  | 2  | 48.49  |
| <i>EgFUL.1</i>         | AT5G60910 | Eucgr.B00634 | scaffold_2:8,088,480..8,094,596    | 2  | 24.35  |
| <i>EgFUL.2</i>         | AT5G60910 | Eucgr.K02547 | scaffold_11:32,650,033..32,656,017 | 11 | 68.51  |
| <i>LFY</i>             | AT5G61850 | Eucgr.K02192 | scaffold_11:29,183,297..29,184,533 | 11 | 63.8   |
| <i>SOC1</i>            | AT2G45660 | na           |                                    |    |        |
| <i>EgSVP.1</i>         | AT2G22540 | Eucgr.I00556 | scaffold_9:11,461,709..11,470,322  | 9  | 17.11  |
| <i>EgSVP.2</i>         | AT2G22540 | Eucgr.F00420 | scaffold_6:5,336,346..5,346,958    | 6  | 14.24  |
| <i>EgTFL1</i>          | AT5G03840 | Eucgr.A01505 | scaffold_1:23,524,373..23,525,501  | 1  | 35.33  |

<sup>a</sup>The miR156, miR157 and miR172 precursors were identified by performing BLAST searches. Putative homologues of genes targeted by miR156 and miR172 were identified using the *E. grandis* genome annotations. Putative homologues of key flowering genes were identified by Vining et al (in prep); genes with “Eg” prefix are *E. grandis* orthologs confirmed by phylogenetic analyses (Vining et al in prep). See methods for details of gene identification.

<sup>b</sup>na, not annotated.
