# Supplementary material
Source: PubMed Central journal article supplement (PMC4455773)
Supplement: supp_g3.114.011916_TableS4.pdf [file supp_g3.114.011916_TableS4.pdf]

**Table S4** Pair-wise Pearson's correlation coefficients for traits measured in the *Eucalyptus globulus* F<sub>2</sub> family.

| Trait                                       | Tree Height         | Last Juvenile Node  | Height to Last Juvenile Node | Juvenile Internode Length | Number of Intermediate Nodes | Node to First Flower | Height to Node of First Flower | Tree Shape         |
|---------------------------------------------|---------------------|---------------------|------------------------------|---------------------------|------------------------------|----------------------|--------------------------------|--------------------|
| Tree Height                                 | -                   |                     |                              |                           |                              |                      |                                |                    |
| Last Juvenile Node                          | 0.09*               | -                   |                              |                           |                              |                      |                                |                    |
| Height to Last Juvenile Node <sup>1</sup>   | 0.32****            | 0.82****            | -                            |                           |                              |                      |                                |                    |
| Juvenile Internode Length                   | 0.43****            | 0.35****            | 0.79****                     | -                         |                              |                      |                                |                    |
| Number of Intermediate Nodes                | -0.09 <sup>ns</sup> | -0.15**             | -0.21****                    | -0.21****                 | -                            |                      |                                |                    |
| Node to First Flower                        | 0.12 <sup>ns</sup>  | 0.64****            | 0.42****                     | -0.03 <sup>ns</sup>       | 0.22***                      | -                    |                                |                    |
| Height to Node of First Flower <sup>1</sup> | 0.44****            | 0.32****            | 0.42****                     | 0.31****                  | 0.09 <sup>ns</sup>           | 0.67****             | -                              |                    |
| Tree Shape                                  | 0.28****            | 0.1*                | 0.19****                     | 0.18****                  | 0.05 <sup>ns</sup>           | 0.13*                | 0.2**                          | -                  |
| Anthesis Time                               | -0.12 <sup>ns</sup> | -0.07 <sup>ns</sup> | -0.07 <sup>ns</sup>          | -0.02 <sup>ns</sup>       | -0.04 <sup>ns</sup>          | 0.02 <sup>ns</sup>   | 0.06 <sup>ns</sup>             | -                  |
|                                             |                     |                     |                              |                           |                              |                      |                                | 0.07 <sup>ns</sup> |

<sup>ns</sup> indicates a non-significant correlation ( $\alpha > 0.05$ ), \* $P \leq 0.05$ , \*\* $P < 0.01$ , \*\*\* $P < 0.001$  and \*\*\*\* $P < 0.0001$

<sup>1</sup>Previous studies commonly report height, rather than node counts, to vegetative and reproductive phase change. For simplicity, only node counts were used in this study (see Jordan *et al.* 1999), but Last Juvenile Node and Node to First Flower were highly correlated with their respective height measurements.
